# Supplementary material for: Early parietofrontal network upregulation relates to future persistent deficits after severe stroke—a prospective cohort study
Source: PubMed Central journal article supplement (PMC8154858; doi:10.1093/braincomms/fcab097), 2021-05-04
Supplement: fcab097_supplementary_data.pdf [file fcab097_supplementary_data.pdf]

# Supplementary Material

## Early parietofrontal network upregulation relates to future persistent deficits after severe stroke

Winifried Backhaus Ph.D. <sup>1, †</sup>, Hanna Braaß MD <sup>1, †</sup>, Focko L. Higgen MD <sup>1</sup>,  
Christian Gerloff MD <sup>1</sup> and Robert Schulz MD <sup>1</sup>

<sup>1</sup> Department of Neurology, University Medical Center Hamburg-Eppendorf, 20246 Hamburg, Germany

<sup>†</sup> contributed equally

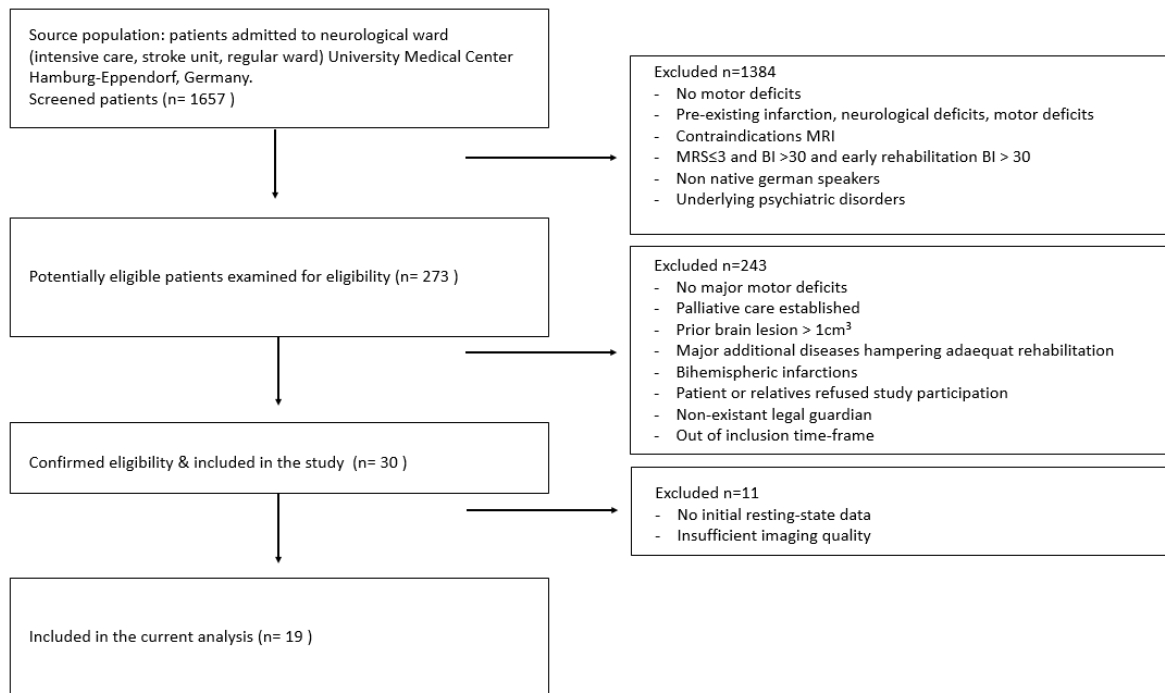

**Supplementary figure 1** | Flow diagram of patient recruitment and participation.

*Supplementary table 1 | Overlap ROI mask and stroke lesions in % of ROI mask.*

| <b>ID</b> | <b>M1</b> | <b>PMV</b> | <b>SMA</b> | <b>AIPS</b> | <b>CIPS</b> |
|-----------|-----------|------------|------------|-------------|-------------|
| 1         | 0,0       | 0,0        | 0,0        | 0,0         | 0,0         |
| 2         | 0,0       | 34,6       | 0,0        | 0,0         | 0,0         |
| 3         | 0,0       | 0,0        | 0,0        | 0,0         | 0,0         |
| 4         | 0,0       | 0,0        | 0,0        | 0,0         | 0,0         |
| 5*        | 53,6      | 98,9       | 0,0        | 0,0         | 0,0         |
| 6         | 0,0       | 0,0        | 0,0        | 0,0         | 0,0         |
| 7         | 0,0       | 9,6        | 0,0        | 0,0         | 0,0         |
| 8         | 0,0       | 5,1        | 0,0        | 0,0         | 0,0         |
| 9*        | 100,0     | 52,8       | 0,0        | 100,0       | 63,4        |
| 10        | 0,0       | 0,0        | 0,0        | 0,0         | 0,0         |
| 11        | 0,0       | 0,0        | 0,0        | 0,0         | 0,0         |
| 12*       | 99,5      | 100,0      | 0,0        | 66,2        | 0,0         |
| 13        | 0,0       | 100,0      | 0,0        | 0,0         | 0,0         |
| 14        | 0,0       | 100,0      | 0,0        | 0,0         | 0,0         |
| 15        | 0,0       | 0,0        | 0,0        | 0,0         | 0,0         |
| 16        | 0,0       | 0,6        | 0,0        | 0,0         | 0,0         |
| 17        | 0,0       | 0,0        | 0,0        | 0,0         | 0,0         |
| 18        | 0,0       | 0,0        | 0,0        | 0,0         | 0,0         |
| 19        | 2,3       | 0,0        | 0,0        | 0,0         | 0,0         |
